# Supplementary material for: Fully plastic microrobots which manipulate objects using only visible light
Source: Royal Society of Chemistry journal article supplement (doi:10.1039/c0sm00012d), 2010-01-01
Supplement: c0sm00012d.pdf [file c0sm00012d.pdf]

**Supporting Information for:**

**Full Plastic Microrobots: Manipulate Objects Only by Visible Light**

Futao Cheng, Ruoyuan Yin, Yuanyuan Zhang, Chu-Chun Yen and Yanlei Yu\*

*Department of Materials Science, Fudan University, 220 Handan Road, Shanghai 200433, China.*

**I. Mechanical strength of the CLCP film before and after laminated with the PE film**

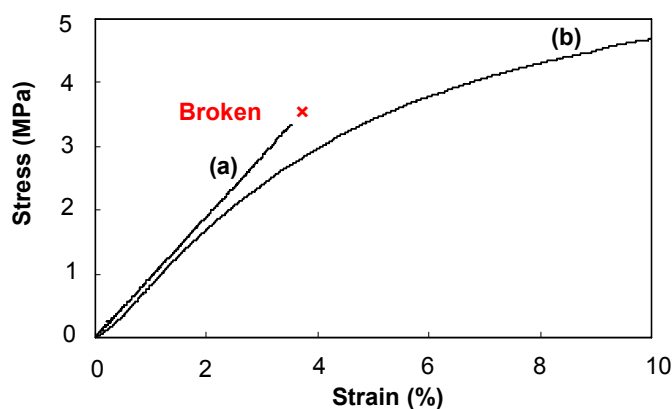

**Fig. S1** Stress-strain curves of the CLCP film before (a) and after (b) laminated with the PE film.

**II. Movies**

**Movie 1** The microrobot consisting of “hand”, “wrist”, and “arm” were manipulated to pick, lift, move, and place an object by irradiating visible light (470 nm, 30 mW cm<sup>-2</sup>) on different parts of the microrobot.

**Movie 2** The microrobot moves an object through its head to a container upon irradiation with visible light (470 nm, 30 mW cm<sup>-2</sup>).

### III. Photographs and schematic illustrations of the manipulating process of the microrobot shown in Movie 2

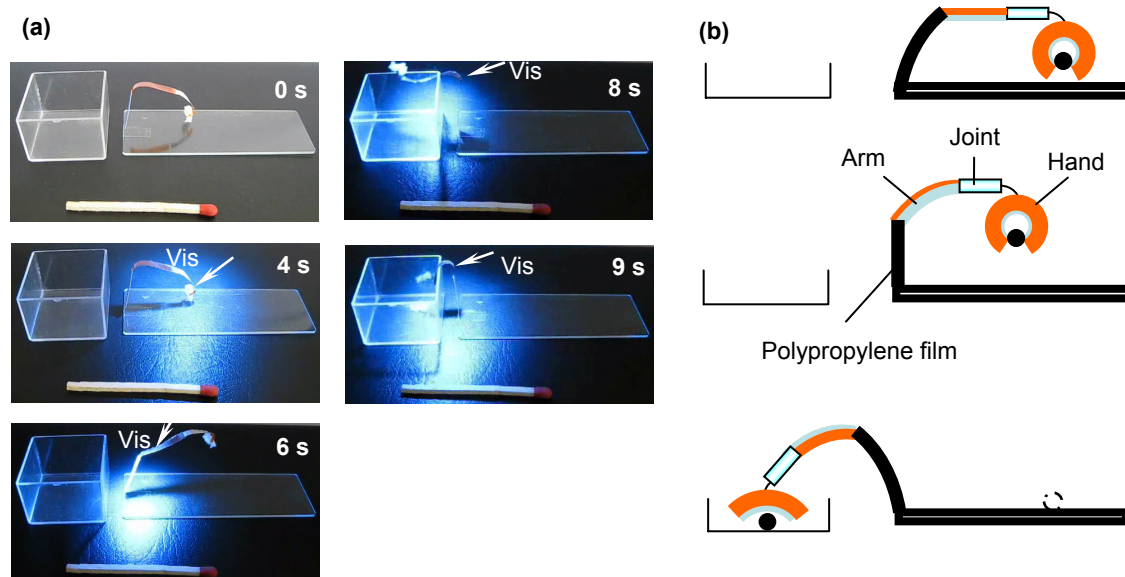

**Fig. S2** (a) Photographs of the microrobot that moves an object through its head to a container by irradiation with visible light ( $470\text{ nm}$ ,  $30\text{ mW cm}^{-2}$ ). Length of the match in the pictures:  $50\text{ mm}$ . Thickness of PE and CLCP films:  $12\text{ }\mu\text{m}$ . Object weight:  $1\text{ mg}$ . (b) Schematic illustrations of the states of the microrobot during the process of manipulating the object.
